# Supplementary figures and images for: Neural tuning matches frequency-dependent time differences between the ears
Source: eLife journal article supplement (doi:10.7554/elife.06072), 2015-04-27

**A**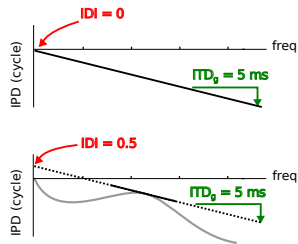**B**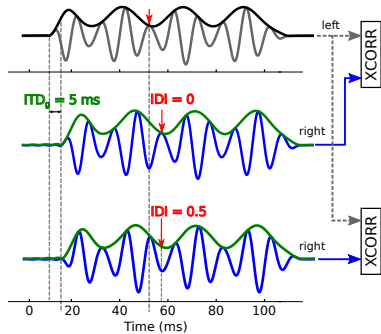**C**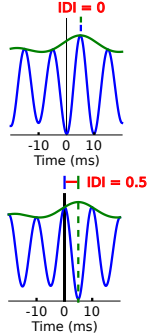**D**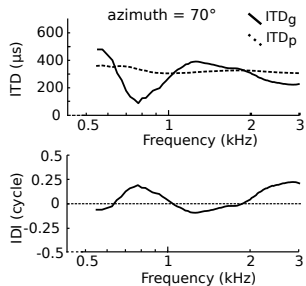**E**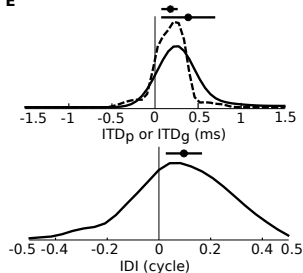

Supplement: supp [file elife-06072-supp-v1.zip]

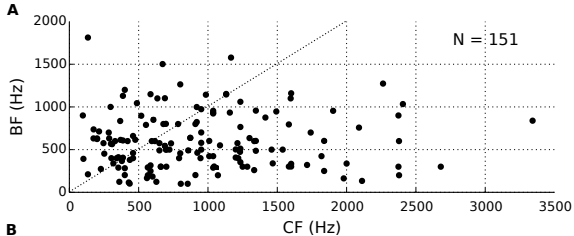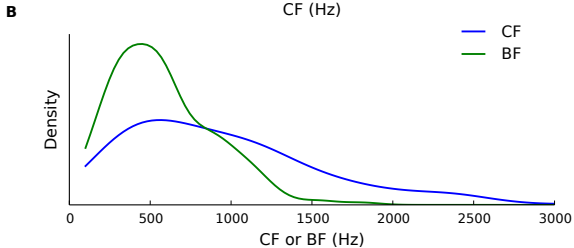

Supplement: supp [file elife-06072-supp-v1.zip]

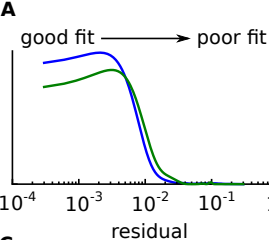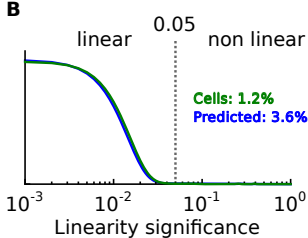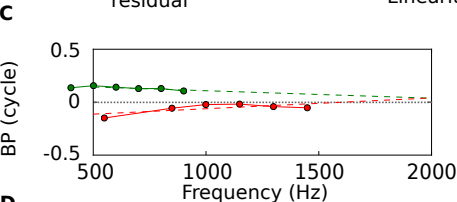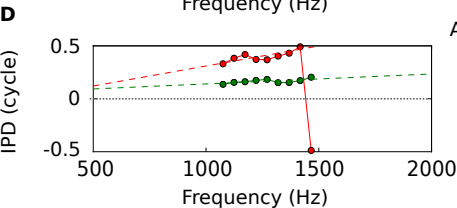

Supplement: supp [file elife-06072-supp-v1.zip]

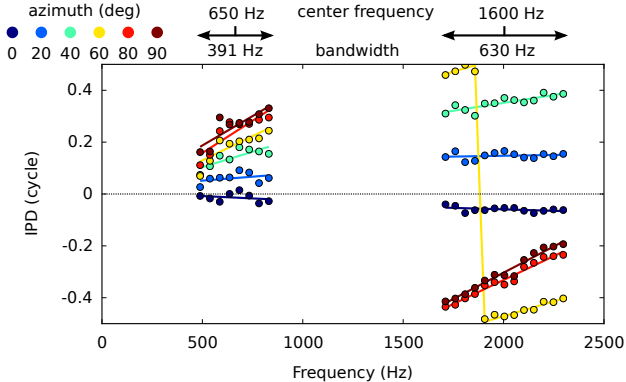

Supplement: supp [file elife-06072-supp-v1.zip]

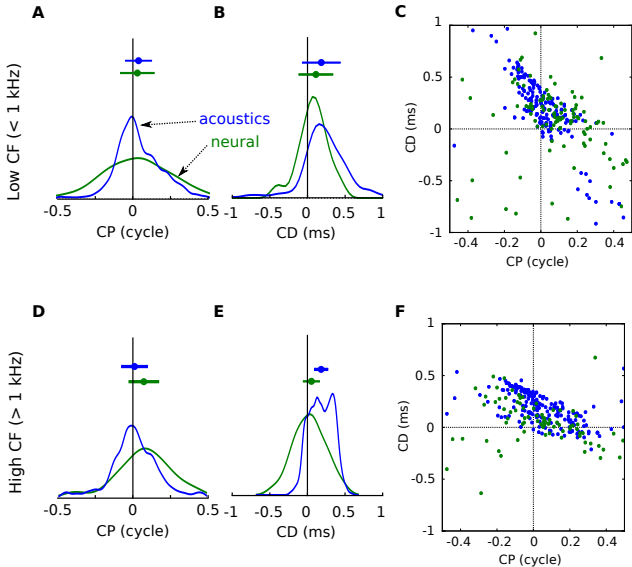

Supplement: supp [file elife-06072-supp-v1.zip]

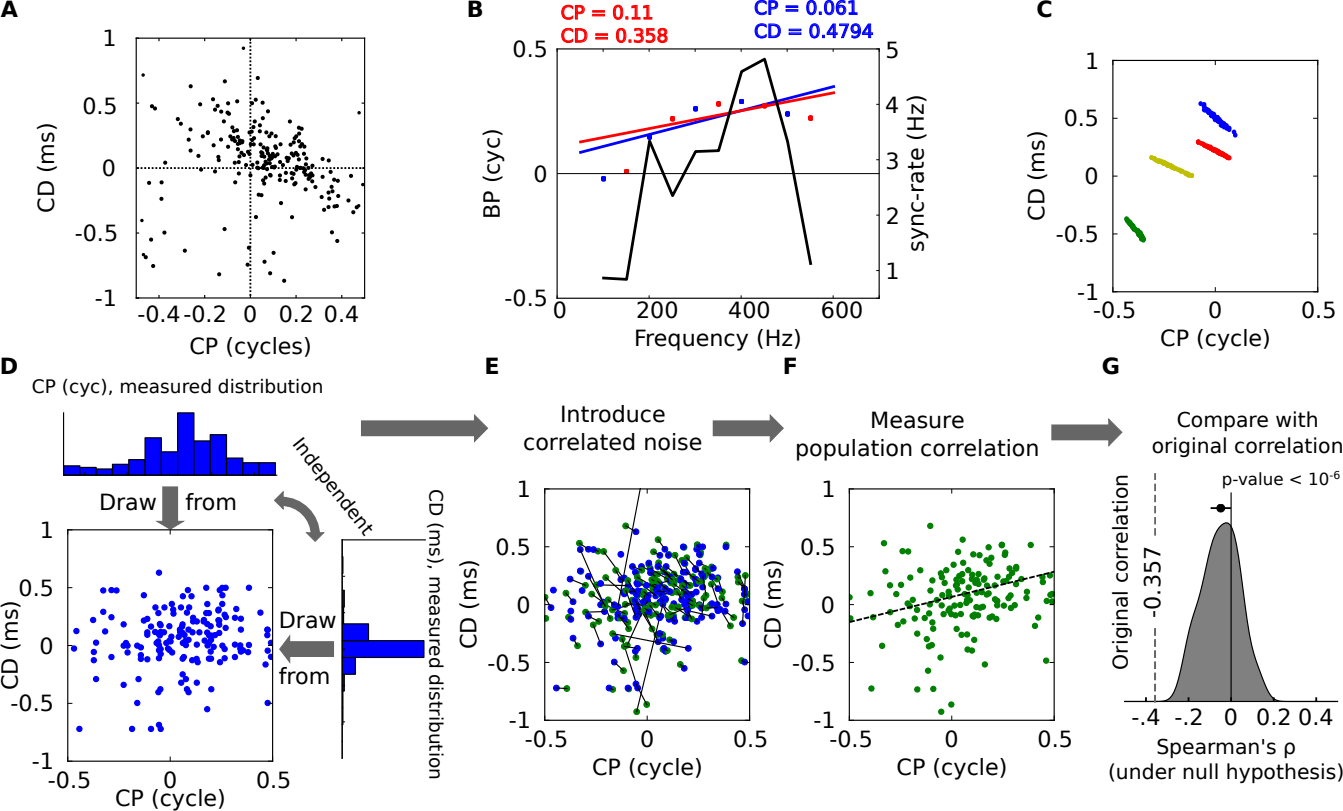

Supplement: supp [file elife-06072-supp-v1.zip]

**A**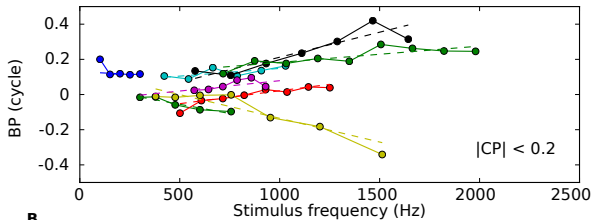**B**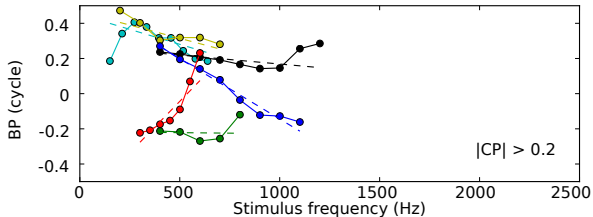

Supplement: supp [file elife-06072-supp-v1.zip]

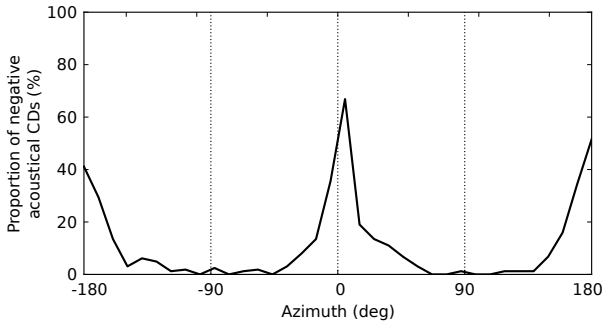

Supplement: supp [file elife-06072-supp-v1.zip]

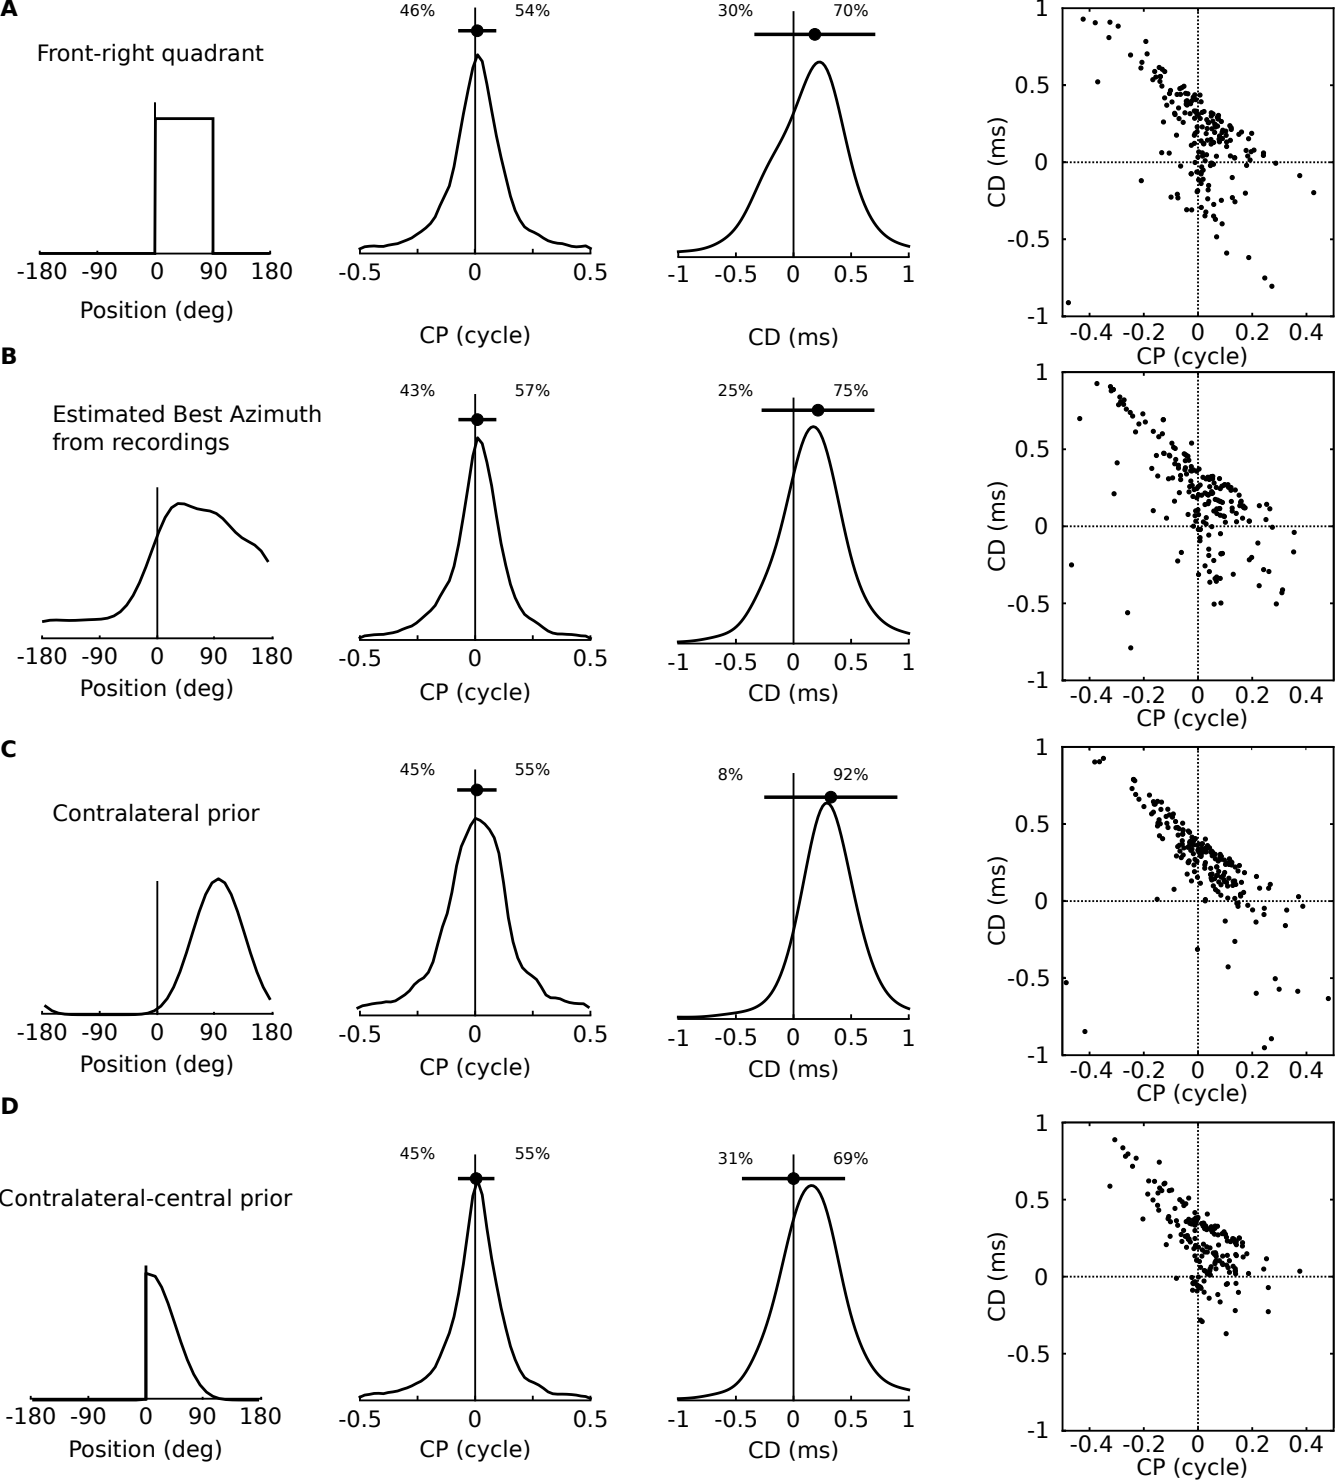

Supplement: supp [file elife-06072-supp-v1.zip]
